# Supplementary material
Source: publisher figshare collection journal article supplement (https://acs.figshare.com/ndownloader/files/5691816)
Supplement: Supplementary file 1 [file 5691816]

# ic010715i.cif

data_ss56


_audit_creation_method            SHELXTL

_chemical_name_systematic

;

   ?

;

_chemical_name_common             ?

_chemical_melting_point           ?

_chemical_formula_moiety          ?

_chemical_formula_sum

   'C H Ag Cl O3 S'

_chemical_formula_weight          236.40


loop_

   _atom_type_symbol

   _atom_type_description

   _atom_type_scat_dispersion_real

   _atom_type_scat_dispersion_imag

   _atom_type_scat_source

   'C'  'C'   0.0033   0.0016

   'International Tables Vol C Tables 4.2.6.8 and 6.1.1.4'

   'H'  'H'   0.0000   0.0000

   'International Tables Vol C Tables 4.2.6.8 and 6.1.1.4'

   'O'  'O'   0.0106   0.0060

   'International Tables Vol C Tables 4.2.6.8 and 6.1.1.4'

   'S'  'S'   0.1246   0.1234

   'International Tables Vol C Tables 4.2.6.8 and 6.1.1.4'

   'Cl'  'Cl'   0.1484   0.1585

   'International Tables Vol C Tables 4.2.6.8 and 6.1.1.4'

   'Ag'  'Ag'  -0.8971   1.1015

   'International Tables Vol C Tables 4.2.6.8 and 6.1.1.4'


_symmetry_cell_setting            Orthorhombic

_symmetry_space_group_name_H-M    Pnma


loop_

   _symmetry_equiv_pos_as_xyz

   'x, y, z'

   '-x+1/2, -y, z+1/2'

   '-x, y+1/2, -z'

   'x+1/2, -y+1/2, -z+1/2'

   '-x, -y, -z'

   'x-1/2, y, -z-1/2'

   'x, -y-1/2, z'

   '-x-1/2, y-1/2, z-1/2'


_cell_length_a                    13.2411(15)

_cell_length_b                    7.5439(12)

_cell_length_c                    4.9248(6)

_cell_angle_alpha                 90.00

_cell_angle_beta                  90.00

_cell_angle_gamma                 90.00

_cell_volume                      491.94(11)

_cell_formula_units_Z             4

_cell_measurement_temperature     293(2)

_cell_measurement_reflns_used     25

_cell_measurement_theta_min       ?

_cell_measurement_theta_max       ?


_exptl_crystal_description        ?

_exptl_crystal_colour             ?

_exptl_crystal_size_max           ?

_exptl_crystal_size_mid           ?

_exptl_crystal_size_min           ?

_exptl_crystal_density_meas       ?

_exptl_crystal_density_diffrn     3.192

_exptl_crystal_density_method     'not measured'

_exptl_crystal_F_000              444

_exptl_absorpt_coefficient_mu     4.943

_exptl_absorpt_correction_type    empirical

_exptl_absorpt_correction_T_min   ?

_exptl_absorpt_correction_T_max   ?

_exptl_absorpt_process_details    ?


_exptl_special_details

;

   ?

;


_diffrn_ambient_temperature       173(1)

_diffrn_radiation_wavelength      0.71073

_diffrn_radiation_type            MoK\a

_diffrn_radiation_source          'sealed tube'

_diffrn_radiation_monochromator   graphite

_diffrn_measurement_device_type   'Bruker R3 Diffractometer'

_diffrn_measurement_method        '\w scans'

_diffrn_detector_area_resol_mean  ?

_diffrn_standards_number          3

_diffrn_standards_interval_count  100

_diffrn_standards_interval_time   ?

_diffrn_standards_decay_%         ?

_diffrn_reflns_number             634

_diffrn_reflns_av_R_equivalents   0.0243

_diffrn_reflns_av_sigmaI/netI     0.0379

_diffrn_reflns_limit_h_min        -1

_diffrn_reflns_limit_h_max        16

_diffrn_reflns_limit_k_min        -9

_diffrn_reflns_limit_k_max        1

_diffrn_reflns_limit_l_min        1

_diffrn_reflns_limit_l_max        6

_diffrn_reflns_theta_min          5.18

_diffrn_reflns_theta_max          27.48

_reflns_number_total              522

_reflns_number_gt                 442

_reflns_threshold_expression      >2sigma(I)


_computing_data_collection        'Bruker XSCANS'

_computing_cell_refinement        'Bruker XSCANS'

_computing_data_reduction         'Bruker SHELXTL'

_computing_structure_solution     'SHELXS-97 (Sheldrick, 1990)'

_computing_structure_refinement   'SHELXL-97 (Sheldrick, 1997)'

_computing_molecular_graphics     'Bruker SHELXTL'

_computing_publication_material   'Bruker SHELXTL'


_refine_special_details

;

   Refinement of F^2^ against ALL reflections.  The weighted R-factor wR and

   goodness of fit S are based on F^2^, conventional R-factors R are based

   on F, with F set to zero for negative F^2^. The threshold expression of

   F^2^ > 2sigma(F^2^) is used only for calculating R-factors(gt) etc. and is

   not relevant to the choice of reflections for refinement.  R-factors based

   on F^2^ are statistically about twice as large as those based on F, and R-

   factors based on ALL data will be even larger.

;


_refine_ls_structure_factor_coef  Fsqd

_refine_ls_matrix_type            full

_refine_ls_weighting_scheme       calc

_refine_ls_weighting_details

   'calc w=1/[\s^2^(Fo^2^)+(0.1067P)^2^+0.0000P] where P=(Fo^2^+2Fc^2^)/3'

_atom_sites_solution_primary      direct

_atom_sites_solution_secondary    difmap

_atom_sites_solution_hydrogens    geom

_refine_ls_hydrogen_treatment     mixed

_refine_ls_extinction_method      SHELXL

_refine_ls_extinction_coef        0.000(4)

_refine_ls_extinction_expression

   'Fc^*^=kFc[1+0.001xFc^2^\l^3^/sin(2\q)]^-1/4^'

_refine_ls_number_reflns          522

_refine_ls_number_parameters      44

_refine_ls_number_restraints      0

_refine_ls_R_factor_all           0.0647

_refine_ls_R_factor_gt            0.0580

_refine_ls_wR_factor_ref          0.1540

_refine_ls_wR_factor_gt           0.1471

_refine_ls_goodness_of_fit_ref    1.093

_refine_ls_restrained_S_all       1.093

_refine_ls_shift/su_max           0.207

_refine_ls_shift/su_mean          0.005


loop_

   _atom_site_label

   _atom_site_type_symbol

   _atom_site_fract_x

   _atom_site_fract_y

   _atom_site_fract_z

   _atom_site_U_iso_or_equiv

   _atom_site_adp_type

   _atom_site_occupancy

   _atom_site_symmetry_multiplicity

   _atom_site_calc_flag

   _atom_site_refinement_flags

   _atom_site_disorder_assembly

   _atom_site_disorder_group

Ag Ag 0.5000 0.0000 0.5000 0.0227(5) Uani 1 2 d S . .

Cl Cl 0.33929(14) 0.2500 0.6560(4) 0.0251(6) Uani 1 2 d S . .

S S 0.12681(16) 0.2500 0.5066(3) 0.0149(6) Uani 1 2 d S . .

O1 O 0.0642(5) 0.2500 0.2608(10) 0.0234(12) Uani 1 2 d S . .

O2 O 0.1168(3) 0.0881(5) 0.6625(7) 0.0224(9) Uani 1 1 d . . .

C C 0.2511(6) 0.2500 0.3773(13) 0.0187(14) Uani 1 2 d S . .

H H 0.262(12) 0.16(2) 0.28(2) 0.022 Uiso 0.50 1 d P . .


loop_

   _atom_site_aniso_label

   _atom_site_aniso_U_11

   _atom_site_aniso_U_22

   _atom_site_aniso_U_33

   _atom_site_aniso_U_23

   _atom_site_aniso_U_13

   _atom_site_aniso_U_12

Ag 0.0230(7) 0.0201(7) 0.0249(6) 0.00119(17) -0.00710(18) -0.0051(2)

Cl 0.0202(10) 0.0285(11) 0.0267(9) 0.000 0.0008(6) 0.000

S 0.0170(11) 0.0125(10) 0.0152(9) 0.000 0.0031(5) 0.000

O1 0.028(3) 0.018(3) 0.025(3) 0.000 -0.008(2) 0.000

O2 0.024(2) 0.017(2) 0.0261(18) 0.0061(14) 0.0050(14) 0.0000(16)

C 0.025(4) 0.020(4) 0.011(3) 0.000 0.002(2) 0.000


_geom_special_details

;

   All esds (except the esd in the dihedral angle between two l.s. planes)

   are estimated using the full covariance matrix.  The cell esds are taken

   into account individually in the estimation of esds in distances, angles

   and torsion angles; correlations between esds in cell parameters are only

   used when they are defined by crystal symmetry.  An approximate (isotropic)

   treatment of cell esds is used for estimating esds involving l.s. planes.

;


loop_

   _geom_bond_atom_site_label_1

   _geom_bond_atom_site_label_2

   _geom_bond_distance

   _geom_bond_site_symmetry_2

   _geom_bond_publ_flag

Ag O2 2.366(4) 6_657 ?

Ag O2 2.366(4) 2_554 ?

Ag O1 2.435(3) 6_656 ?

Ag O1 2.435(3) 2 ?

Ag Cl 2.9454(15) . ?

Cl C 1.802(8) . ?

S O2 1.449(3) 7_565 ?

S O2 1.449(3) . ?

S O1 1.467(5) . ?

S C 1.765(8) . ?

O1 Ag 2.435(3) 2_554 ?

O1 Ag 2.435(3) 4_455 ?

O2 Ag 2.366(4) 2 ?


loop_

   _geom_angle_atom_site_label_1

   _geom_angle_atom_site_label_2

   _geom_angle_atom_site_label_3

   _geom_angle

   _geom_angle_site_symmetry_1

   _geom_angle_site_symmetry_3

   _geom_angle_publ_flag

O2 Ag O2 180.00(15) 6_657 2_554 ?

O2 Ag O1 85.70(16) 6_657 6_656 ?

O2 Ag O1 94.30(16) 2_554 6_656 ?

O2 Ag O1 94.30(16) 6_657 2 ?

O2 Ag O1 85.70(16) 2_554 2 ?

O1 Ag O1 180.0(4) 6_656 2 ?

O2 Ag Cl 96.26(10) 6_657 . ?

O2 Ag Cl 83.74(10) 2_554 . ?

O1 Ag Cl 83.90(12) 6_656 . ?

O1 Ag Cl 96.10(12) 2 . ?

C Cl Ag 105.62(19) . . ?

O2 S O2 114.9(3) 7_565 . ?

O2 S O1 112.7(2) 7_565 . ?

O2 S O1 112.7(2) . . ?

O2 S C 106.1(2) 7_565 . ?

O2 S C 106.1(2) . . ?

O1 S C 103.3(3) . . ?

S O1 Ag 129.23(9) . 2_554 ?

S O1 Ag 129.23(9) . 4_455 ?

Ag O1 Ag 101.53(18) 2_554 4_455 ?

S O2 Ag 132.0(2) . 2 ?

S C Cl 109.2(3) . . ?


_diffrn_measured_fraction_theta_max    0.859

_diffrn_reflns_theta_full              27.48

_diffrn_measured_fraction_theta_full   0.859

_refine_diff_density_max    1.918

_refine_diff_density_min   -1.342

_refine_diff_density_rms    0.346


#===END
